# Supplementary material
Source: PubMed Central journal article supplement (PMC6439696)
Supplement: jamainternmed-179-297-s001.pdf [file jamainternmed-179-297-s001.pdf]

## Supplementary Online Content

Edelman EJ, Gordon KS, Crothers K, et al. Association of prescribed opioids with increased community-acquired pneumonia among patients with and without HIV. *JAMA Intern Med*. Published online January 7, 2019. doi:10.1001/jamainternmed.2018.6101

**eTable 1.** Prescribed Opioid Characteristics Among Cases and Controls Prescribed Opioids, Overall and Stratified by HIV Status

**eTable 2.** Conditional Logistic Regression for Prescribed Opioids and Community-Acquired Pneumonia Risk

This supplementary material has been provided by the authors to give readers additional information about their work.

**eTable 1. Prescribed Opioid Characteristics Among Cases and Controls Prescribed Opioids, Overall and Stratified by HIV Status**

| Characteristic, n(%)                                | Overall, N=25,392     |               | Uninfected, n=10,486 |               | PLWH, n=14,906        |               |
|-----------------------------------------------------|-----------------------|---------------|----------------------|---------------|-----------------------|---------------|
|                                                     | Controls, n=21<br>146 | Cases, n=4246 | Controls, n=8710     | Cases, n=1776 | Controls, n=12<br>436 | Cases, n=2470 |
| <b>Prescription opioid timing<sup>a</sup></b>       |                       |               |                      |               |                       |               |
| None                                                | 16086 (76)            | 2681 (63)     | 6412 (74)            | 1065 (60)     | 9674 (78)             | 1616 (65)     |
| past only (61-365 days)                             | 2675 (13)             | 713 (17)      | 1107 (13)            | 305 (17)      | 1568 (13)             | 408 (16)      |
| current (5-60 days)                                 | 2385 (11)             | 852 (20)      | 1191 (14)            | 406 (23)      | 1194 (9)              | 446 (18)      |
| <b>Days supplied, median (IQR)</b>                  | 30 (10, 116)          | 37 (12, 134)  | 46 (13, 158)         | 55 (15, 180)  | 29 (9, 86)            | 30 (10, 108)  |
| <b>Average MEDD, median (IQR)<sup>a,b</sup></b>     | 20 (14, 30)           | 22 (15, 39)   | 20 (14, 31)          | 23 (15, 42)   | 20 (14, 31)           | 22 (14, 36)   |
| <b>Prescribed immunosuppressive opioids</b>         |                       |               |                      |               |                       |               |
| Immunosuppressive <sup>a,b</sup>                    | 1672 (33)             | 646 (41)      | 697 (30)             | 274 (38)      | 975 (35)              | 372 (44)      |
| Unknown immunosuppressive properties <sup>a,b</sup> | 1321 (26)             | 354 (23)      | 737 (32)             | 183 (26)      | 584 (21)              | 171 (20)      |
| No immunosuppressive properties <sup>a,b</sup>      | 2067 (41)             | 565 (36)      | 864 (38)             | 254 (36)      | 1203 (44)             | 311 (36)      |

Notes: MEDD= morphine equivalent daily dose. a. indicates all comparisons for cases versus controls significant at p<0.05 level, except for comparison between cases and controls for days supplied among uninfected (p=0.11); b. indicates sample restricted to those with at least one opioid prescription in the year prior to index date. P values for comparison between controls and cases.

| <b>eTable 2. Conditional Logistic Regression for Prescribed Opioids and Community-Acquired Pneumonia Risk</b> |                             |                 |                           |                 |                             |                 |                       |                 |
|---------------------------------------------------------------------------------------------------------------|-----------------------------|-----------------|---------------------------|-----------------|-----------------------------|-----------------|-----------------------|-----------------|
|                                                                                                               | <b>Unadjusted, n=25 392</b> |                 | <b>Adjusted, n=25 392</b> |                 | <b>Uninfected, n=10 486</b> |                 | <b>PLWH, n=14 906</b> |                 |
| <b>Characteristic</b>                                                                                         | <b>OR (95% CI)</b>          | <b>P Values</b> | <b>OR (95% CI)</b>        | <b>P Values</b> | <b>OR (95% CI)</b>          | <b>P Values</b> | <b>OR (95% CI)</b>    | <b>P Values</b> |
| <b>Prescribed opioid characteristics</b>                                                                      |                             |                 |                           |                 |                             |                 |                       |                 |
| None (reference)                                                                                              | 1                           | n/a             | 1                         | n/a             | 1                           | n/a             | 1                     | n/a             |
| Past any dose, immunosuppressive                                                                              | 1.80 (1.56, 2.08)           | <.001           | 1.42 (1.21, 1.67)         | <.001           | 1.56 (1.21, 2.01)           | <.001           | 1.34 (1.09, 1.64)     | .006            |
| Past any dose, unknown/not immunosuppressive                                                                  | 1.51 (1.34, 1.69)           | <.001           | 1.24 (1.09, 1.40)         | .001            | 1.32 (1.10, 1.59)           | .003            | 1.16 (0.98, 1.37)     | .08             |
| Current low dose, immunosuppressive                                                                           | 1.85 (1.50, 2.28)           | <.001           | 1.35 (1.07, 1.70)         | .01             | 0.98 (0.67, 1.43)           | .92             | 1.65 (1.23, 2.22)     | .001            |
| Current low dose, unknown/not immunosuppressive                                                               | 1.66 (1.41, 1.95)           | <.001           | 1.23 (1.03, 1.48)         | .02             | 1.22 (0.95, 1.57)           | .12             | 1.24 (0.95, 1.61)     | .11             |
| Current medium dose, immunosuppressive                                                                        | 3.31 (2.61, 4.18)           | <.001           | 2.07 (1.59, 2.71)         | <.001           | 1.76 (1.20, 2.57)           | .004            | 2.33 (1.60, 3.40)     | <.001           |
| Current medium dose, unknown/not immunosuppressive                                                            | 1.82 (1.54, 2.15)           | <.001           | 1.35 (1.13, 1.62)         | .001            | 1.39 (1.07, 1.79)           | .01             | 1.33 (1.03, 1.72)     | .03             |
| Current high dose, immunosuppressive                                                                          | 5.11 (4.02, 6.48)           | <.001           | 3.18 (2.44, 4.14)         | <.001           | 3.13 (2.14, 4.57)           | <.001           | 3.26 (2.24, 4.73)     | <.001           |
| Current high dose, unknown/not immunosuppressive                                                              | 2.91 (2.17, 3.90)           | <.001           | 2.07 (1.50, 2.86)         | <.001           | 1.66 (1.06, 2.60)           | .03             | 2.60 (1.62, 4.17)     | <.001           |
| <b>Smoking (reference none)</b>                                                                               |                             |                 | 1                         | n/a             | 1                           | n/a             | 1                     | n/a             |
| Current                                                                                                       |                             |                 | 1.73 (1.56, 1.91)         | <.001           | 1.80 (1.54, 2.09)           | <.001           | 1.67 (1.46, 1.91)     | <.001           |
| Former                                                                                                        |                             |                 | 1.19 (1.05, 1.35)         | .01             | 1.16 (0.97, 1.38)           | .11             | 1.21 (1.02, 1.44)     | .03             |
| Missing                                                                                                       |                             |                 | 2.71 (2.26, 3.25)         | <.001           | 2.77 (2.09, 3.69)           | <.001           | 2.63 (2.07, 3.33)     | <.001           |
| <b>Diabetes mellitus</b>                                                                                      |                             |                 | 1.34 (1.22, 1.47)         | <.001           | 1.38 (1.22, 1.57)           | <.001           | 1.23 (1.07, 1.42)     | .004            |
| <b>Chronic obstructive pulmonary disease</b>                                                                  |                             |                 | 1.69 (1.53, 1.88)         | <.001           | 1.61 (1.39, 1.86)           | <.001           | 1.74 (1.50, 2.02)     | <.001           |
| <b>Congestive heart failure</b>                                                                               |                             |                 | 2.22 (1.89, 2.62)         | <.001           | 2.10 (1.72, 2.58)           | <.001           | 2.38 (1.81, 3.13)     | <.001           |
| <b>Stroke</b>                                                                                                 |                             |                 | 2.06 (1.68, 2.52)         | <.001           | 2.26 (1.75, 2.92)           | <.001           | 1.75 (1.26, 2.44)     | .001            |
| <b>Alcohol-related diagnosis</b>                                                                              |                             |                 | 1.09 (0.97, 1.23)         | .13             | 1.06 (0.88, 1.26)           | .56             | 1.13 (0.97, 1.32)     | .13             |
| <b>Drug-related diagnosis</b>                                                                                 |                             |                 | 1.21 (1.07, 1.38)         | .003            | 1.35 (1.10, 1.67)           | .005            | 1.13 (0.96, 1.33)     | .14             |
| <b>Long-term benzodiazepine receipt</b>                                                                       |                             |                 | 1.12 (0.98, 1.27)         | 0.09            | 1.14 (0.95, 1.37)           | .15             | 1.09 (0.91, 1.30)     | .37             |
| <b>Flu vaccine</b>                                                                                            |                             |                 | 0.78 (0.71, 0.85)         | <.001           | 0.88 (0.77, 1.01)           | .06             | 0.69 (0.61, 0.77)     | <.001           |
| <b>Pneumococcal vaccine</b>                                                                                   |                             |                 | 0.88 (0.81, 0.95)         | .002            | 1.09 (0.96, 1.24)           | .20             | 0.74 (0.67, 0.83)     | <.001           |
| <b>No. of prior pneumonia</b>                                                                                 |                             |                 | 2.14 (1.81, 2.53)         | <.001           | 3.47 (2.05, 5.89)           | <.001           | 1.99 (1.66, 2.38)     | <.001           |
| <b>Current oral steroids</b>                                                                                  |                             |                 | 2.36 (1.90, 2.93)         | <.001           | 2.69 (1.97, 3.66)           | <.001           | 2.13 (1.56, 2.91)     | <.001           |
| <b>Prior oral steroids</b>                                                                                    |                             |                 | 1.47 (1.26, 1.73)         | <.001           | 1.26 (0.99, 1.60)           | .06             | 1.67 (1.35, 2.07)     | <.001           |

|                                               |  |  |                   |       |                   |       |                   |       |
|-----------------------------------------------|--|--|-------------------|-------|-------------------|-------|-------------------|-------|
| <b>Current inhaled steroids</b>               |  |  | 1.27 (0.98, 1.64) | .07   | 1.10 (0.79, 1.54) | .58   | 1.46 (0.97, 2.20) | .07   |
| <b>Prior inhaled steroids</b>                 |  |  | 1.70 (1.35, 2.13) | <.001 | 1.91 (1.42, 2.57) | <.001 | 1.42 (1.00, 2.03) | .05   |
| <b>VACS index score in 5 point increments</b> |  |  | 1.15 (1.13, 1.16) | <.001 | 1.15 (1.12, 1.17) | <.001 | 1.14 (1.13, 1.16) | <.001 |
